# Supplementary material for: Association between poor parent-daughter relationships and the risk of hyperglycemia in pregnancy: a hospital-based prospective cohort study in Japan
Source: Springer Nature journal article supplement (doi:10.1186/s12884-023-05535-3), 2023-04-04
Supplement: MOESM1 [file 25207574]

Supplementary Table1 Effect Decomposition of Total Effect of parent-child relationship due to psychiatric disease history on hyperglycemia in pregnancy

|     | OR [95% CI] <sup>a</sup> | p-value |
|-----|--------------------------|---------|
| mte | 1.29 (0.92-1.82)         | 0.14    |
| nde | 1.29 (0.91-1.84)         | 0.16    |
| nie | 1.00 (0.93-1.07)         | 0.98    |

Note:

OR=Odds Ratio, CI=Confidence Interval,  
mte=marginal total effect, nde=natural direct effect,  
nie=natural indirect effect

a: Covariates included maternal age, academic background

Supplementary Table 2 Multiple imputation analysis for the association between hyperglycemia in pregnancy and satisfaction for relationship with parents or covariates

|                                                   | Crude OR <sup>a</sup> [95%<br>CI] <sup>b</sup> | Adjusted OR [95%<br>CI] <sup>c</sup> | p-value   |
|---------------------------------------------------|------------------------------------------------|--------------------------------------|-----------|
| <b>Satisfaction for relationship with parents</b> |                                                |                                      |           |
| Satisfied                                         | reference                                      | reference                            | reference |
| Not very satisfied                                | 1.66 (1.07-2.57)                               | 1.50 (0.96-2.34)                     | 0.08      |
| Not satisfied at all                              | 1.29 (0.47-3.52)                               | 1.02 (0.37-2.82)                     | 0.97      |
| <b>Psychiatric disease history</b>                | 1.74 (1.13-2.65)                               | 1.54 (0.99-2.37)                     | 0.05      |
| <b>Maternal age at delivery (year)</b>            |                                                |                                      |           |
| 15-19                                             | reference                                      | reference                            | reference |
| 20-24                                             | 0.17 (0.050-0.61)                              | 0.21 (0.059-0.76)                    | 0.02      |
| 25-29                                             | 0.45 (0.16-1.28)                               | 0.56 (0.19-1.67)                     | 0.30      |
| 30-34                                             | 0.64 (0.23-1.80)                               | 0.82 (0.28-2.40)                     | 0.71      |
| 35-39                                             | 1.03 (0.37-2.91)                               | 1.31 (0.45-3.85)                     | 0.62      |
| 40-44                                             | 1.05 (0.35-3.17)                               | 1.32 (0.45-3.85)                     | 0.64      |
| 45-49                                             | 1.78 (0.18-18.00)                              | 2.53 (0.24-26.15)                    | 0.44      |
| 50-54                                             | -                                              | -                                    | -         |
| <b>Academic background</b>                        |                                                |                                      |           |
| University or more                                | reference                                      | reference                            | reference |
| High school graduate                              | 1.66 (0.92-3.00)                               | 2.04 (1.11-3.73)                     | 0.02      |
| Junior high school graduate                       | 1.52 (0.69-3.34)                               | 1.60 (0.72-3.57)                     | 0.25      |

Note:

a: OR=Odds Ratio b: CI=Confidence Interval

c: Covariates included maternal age, academic background, psychiatric disease history

Supplementary Table 3 Multiple imputation analysis for associations between hyperglycemia in pregnancy and satisfaction for relationship with mothers stratified by psychiatric disease history

|                                   | Crude OR <sup>a</sup> [95% CI] <sup>b</sup> | Adjusted OR [95% CI] <sup>c</sup> |
|-----------------------------------|---------------------------------------------|-----------------------------------|
| <b><u>Psychiatric disease</u></b> |                                             |                                   |
| <b><u>history (-)</u></b>         |                                             |                                   |
| <b>satisfaction for</b>           |                                             |                                   |
| <b>relationship with parents</b>  |                                             |                                   |
| Satisfied                         | reference                                   | reference                         |
| Not very satisfied                | 1.79 (1.13-2.85)                            | 1.73 (1.09-2.77)                  |
| Not satisfied at all              | 1.29 (0.40-4.14)                            | 1.17 (0.36-3.81)                  |
| <b><u>Psychiatric disease</u></b> |                                             |                                   |
| <b><u>history (+)</u></b>         |                                             |                                   |
| <b>satisfaction for</b>           |                                             |                                   |
| <b>relationship with parents</b>  |                                             |                                   |
| Satisfied                         | reference                                   | reference                         |
| Not very satisfied                | 0.77 (0.23-2.58)                            | 0.71 (0.20-2.49)                  |
| Not satisfied at all              | 0.78 (0.10-5.77)                            | 0.59 (0.076-4.60)                 |

Note:

a: OR=Odds Ratio b: CI=Confidence Interval

c: Covariates included maternal age, academic background
